# Supplementary material for: Hemin-lipid assembly as an artemisinin oral delivery system for enhanced cancer chemotherapy and immunotherapy
Source: Royal Society of Chemistry journal article supplement (doi:10.1039/d1nr01302e), 2021-01-01
Supplement: d1nr01302e1.pdf [file d1nr01302e1.pdf]

## Electronic Supplementary Information

### **Hemin-lipid Assembly as Artemisinin Oral Delivery System for Enhanced Cancer Chemotherapy and Immunotherapy**

Qing Wang,<sup>a,†</sup> Naijie Wei,<sup>†,c</sup> Jingru Guo,<sup>a</sup> Kai Feng,<sup>a</sup> Yin Kwan Wong,<sup>b</sup> Jinwei Zhang,  
<sup>c,\*</sup> Jigang Wang,<sup>b,\*</sup> Xiaolian Sun<sup>a,\*</sup>

<sup>a</sup>State Key Laboratory of Natural Medicines, Key Laboratory of Drug Quality Control and Pharmacovigilance, Department of Pharmaceutical Analysis, China Pharmaceutical University, Nanjing 210009, China

<sup>b</sup>Artemisinin Research Center, and Institute of Chinese Materia Medica, China Academy of Chinese Medical Sciences, Beijing 100700, China

<sup>c</sup>State Key Laboratory of Natural Medicines, Key Laboratory of Drug Metabolism and Pharmacokinetics, China Pharmaceutical University, Nanjing 210009, China

<sup>†</sup>These authors made equal contributions to this work.

\*Corresponding authors: [xiaolian\\_sun@cpu.edu.cn](mailto:xiaolian_sun@cpu.edu.cn); [jgawang@icmm.ac.cn](mailto:jgawang@icmm.ac.cn) ;  
[zhangjw\\_cnnj@sina.com](mailto:zhangjw_cnnj@sina.com)

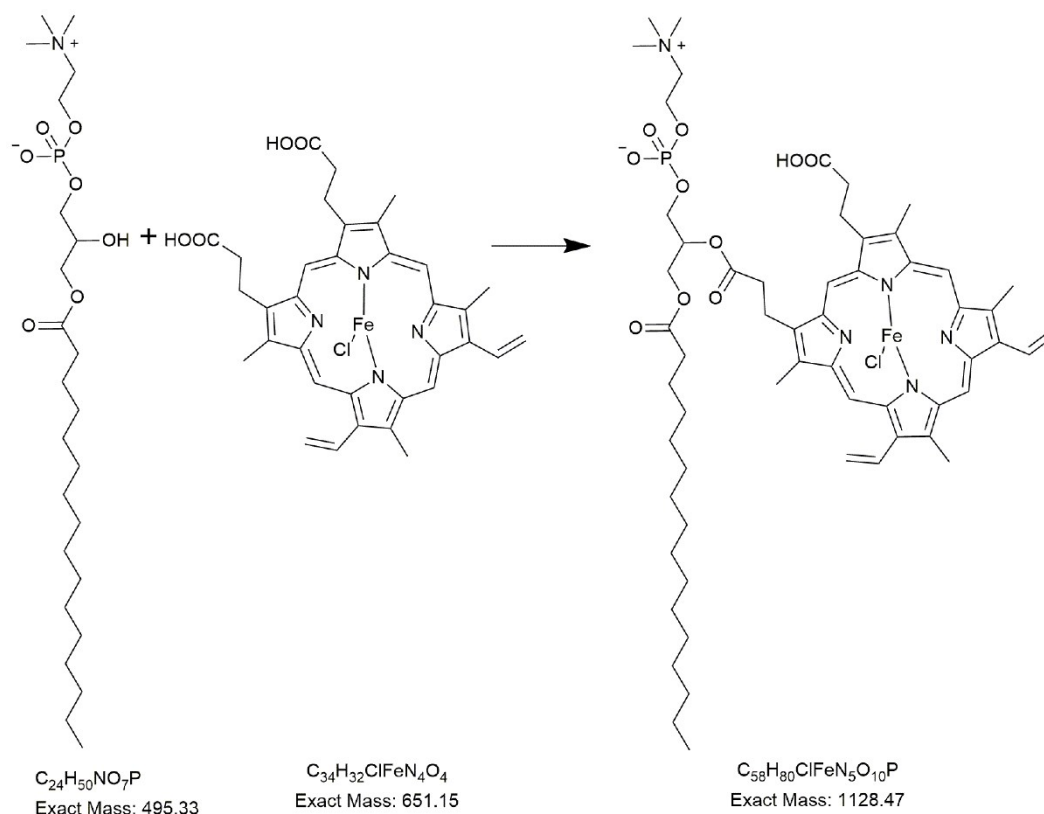

**Figure. S1** Schematic for the synthesis of hemin-lipid conjugate.

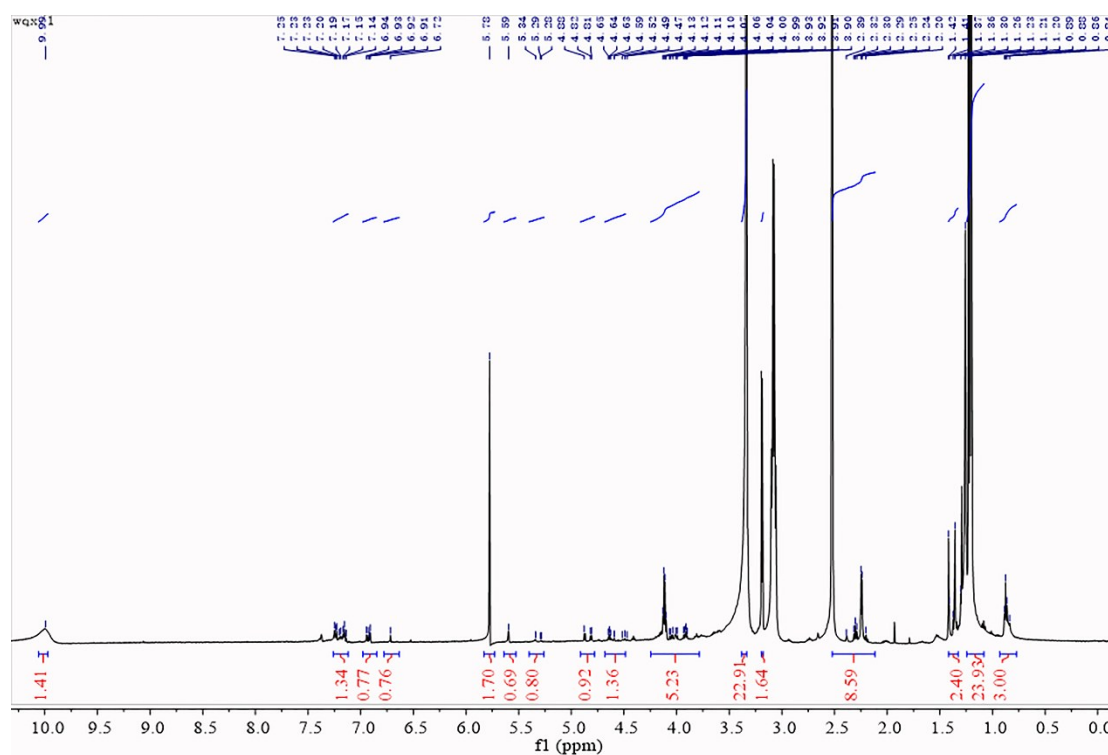

**Figure. S2**  $^1\text{H}$ -NMR spectra of hemin-lipid with a Bruker ACF-300 MHz NMR spectrometer in  $\text{DMSO-d}_6$ .

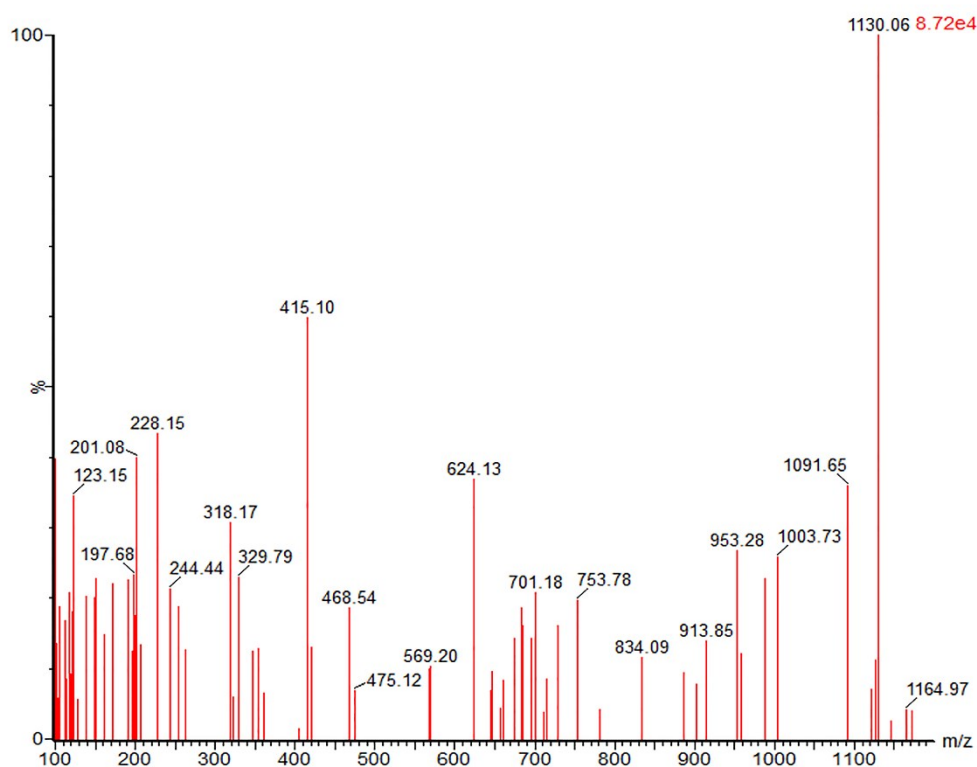

**Figure. S3** Mass spectroscopy confirmed the conjugation of hemin to 1-palmitoyl-2-hydroxysn-glycero-3-phosphocholine (16:0 Lyso PC). The Measured m/z of  $[M+H]^+$  is 1130.06 and predicted value is 1130.57.

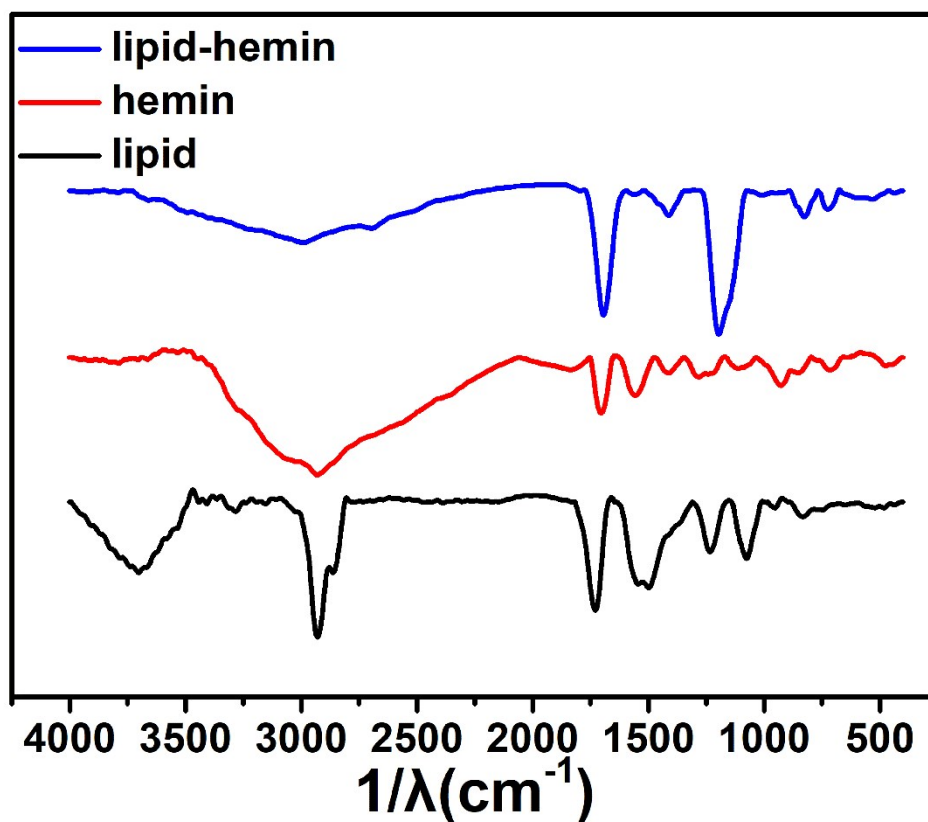

**Figure. S4** FT-IR spectra of lipid, hemin and hemin-lipid.

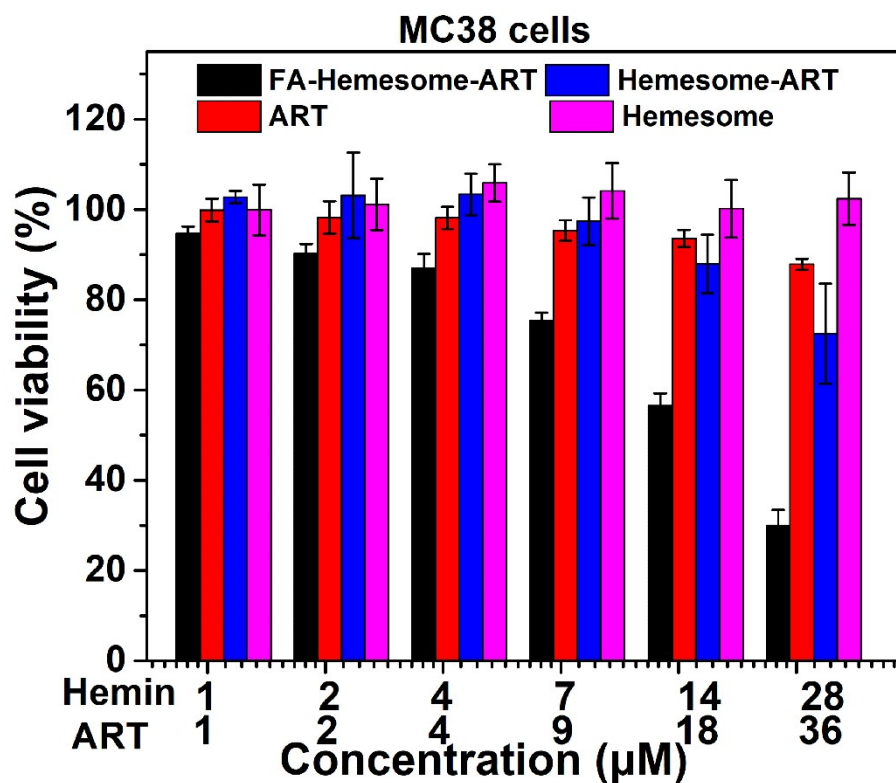

**Figure. S5** Cytotoxicity of MC38 cells treated with ART, Hemesome, Hemesome-ART, FA-Hemesome-ART in vitro. Data represent mean  $\pm$  SD (n = 3).

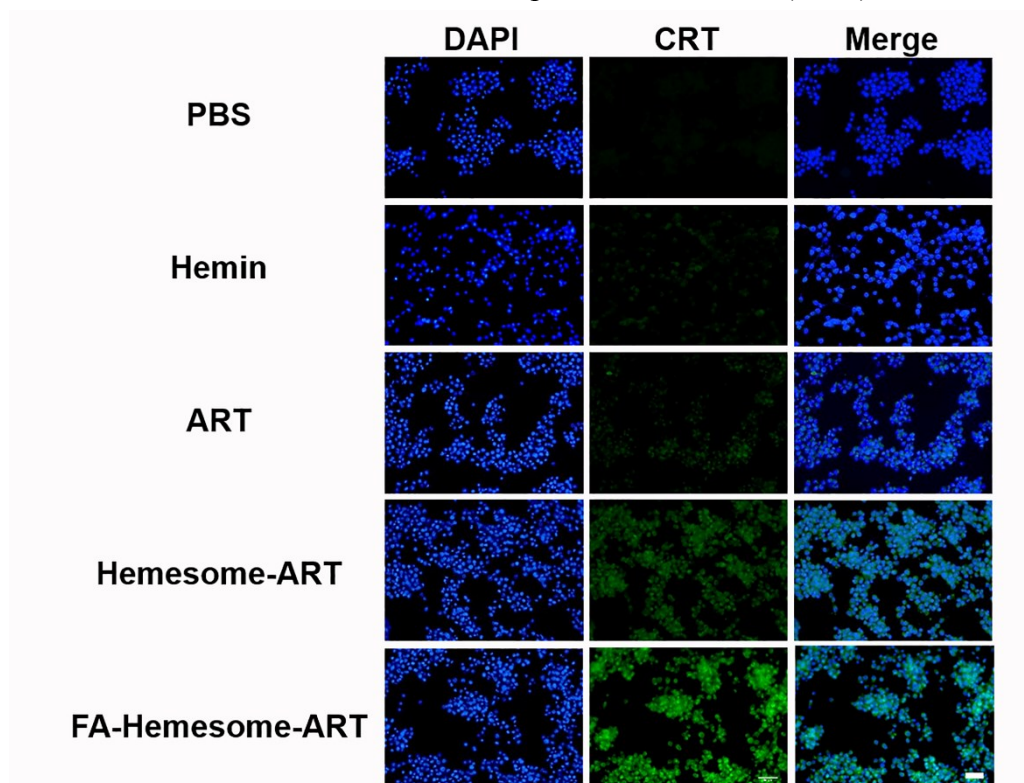

**Figure. S6** CRT expression on the MC38 cell surface after different treatments. Scale bar: 100  $\mu$ m.

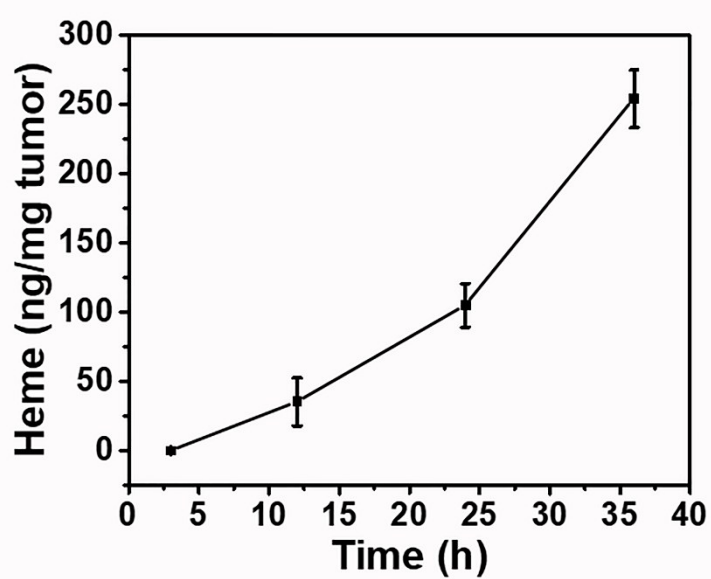

**Figure. S7** The content of heme in the tumor after oral administration of FA-Hemesome-ART at different time-point: 3, 12, 24 and 36 h.

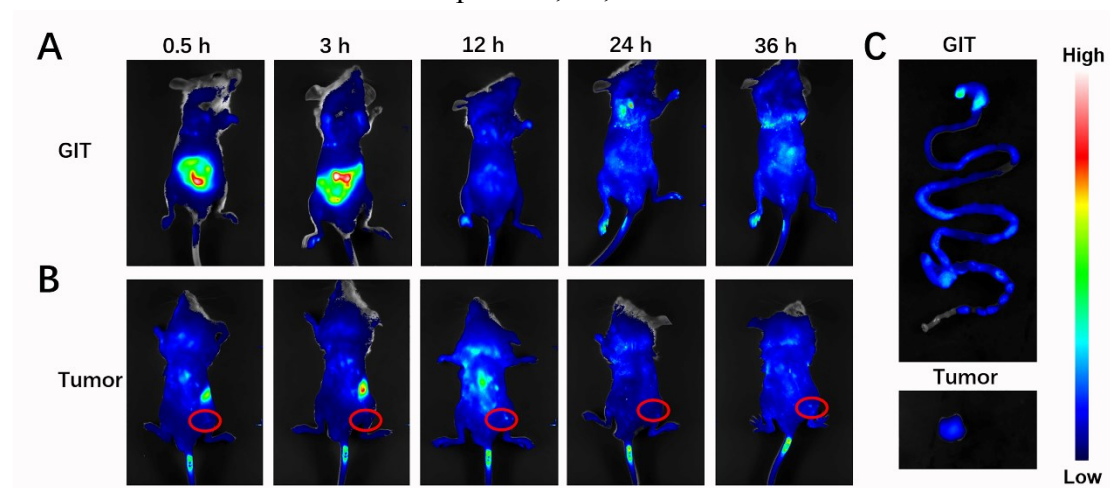

**Figure. S8** Fluorescence images of 4T1 tumors bearing mice after oral administration of PpIX at different time-point.

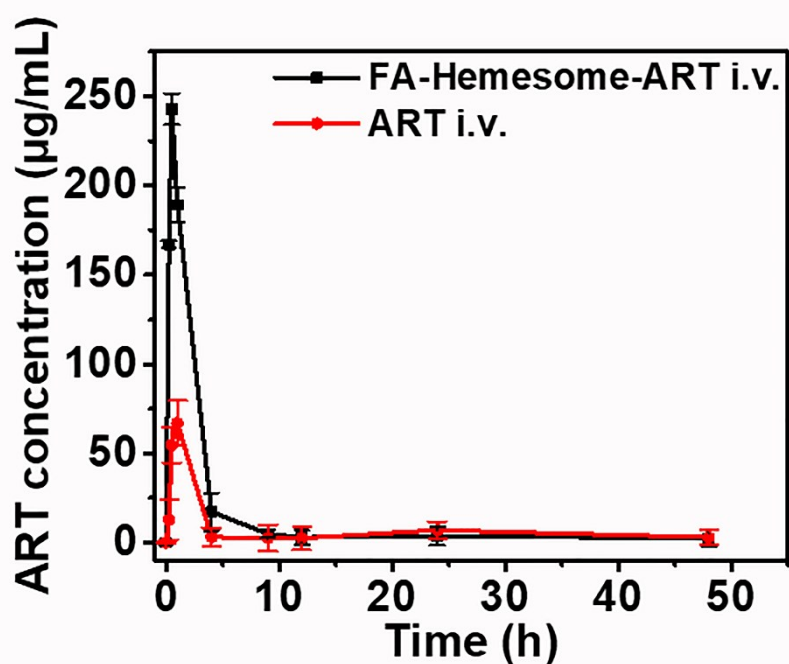

**Figure. S9** Plasma concentration-time profiles of ART and FA-Hemesome-ART NPs in mice by intravenous injection.

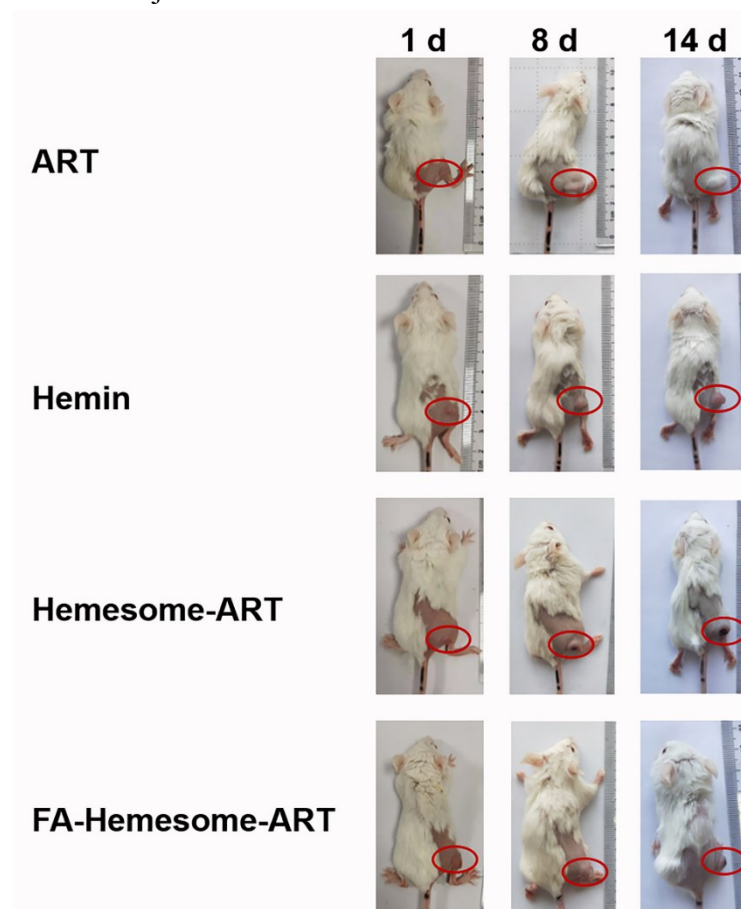

**Figure. S10** The images of 4T1 tumor-bearing mice on the 1, 8, 14 day during the different groups by oral administration.

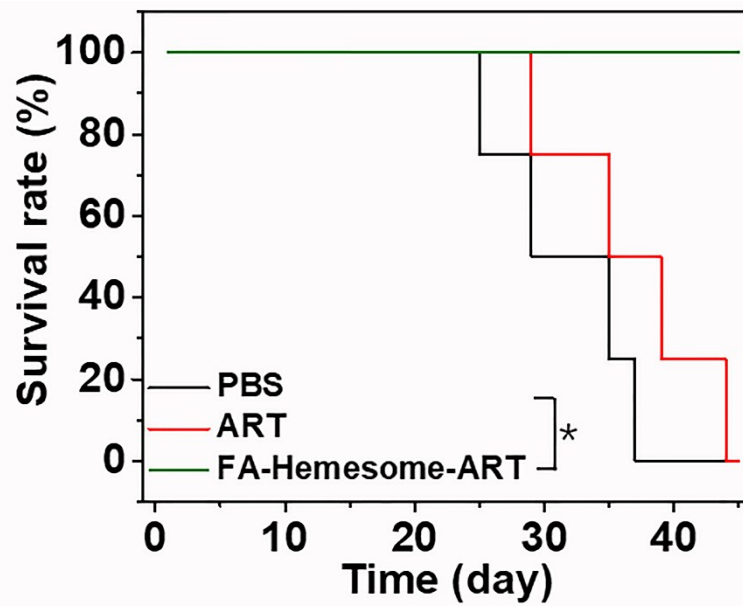

**Figure. S11** Survival rate of mice in different groups in 4T1 tumors bearing mice after oral administration (n = 4). \*P value < 0.05 by student's two-tailed t test.

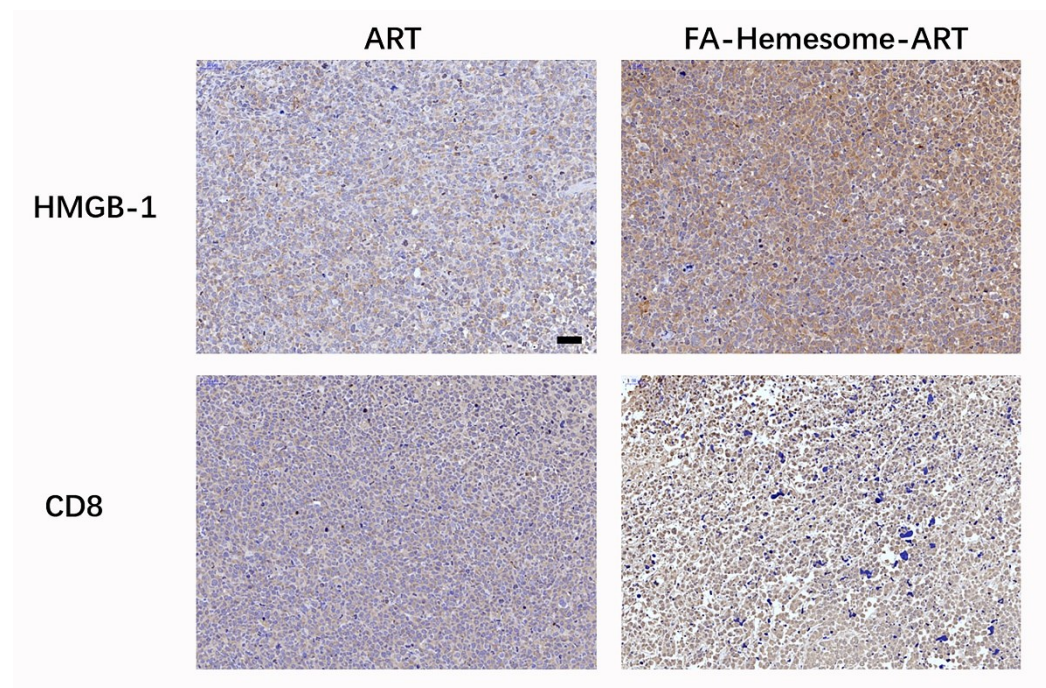

**Figure. S12** The *in situ* secretion of HMGB-1 and the infiltration of CD8<sup>+</sup> T cells in the tumor were observed by immunohistochemistry. Scale bar: 50  $\mu$ m.

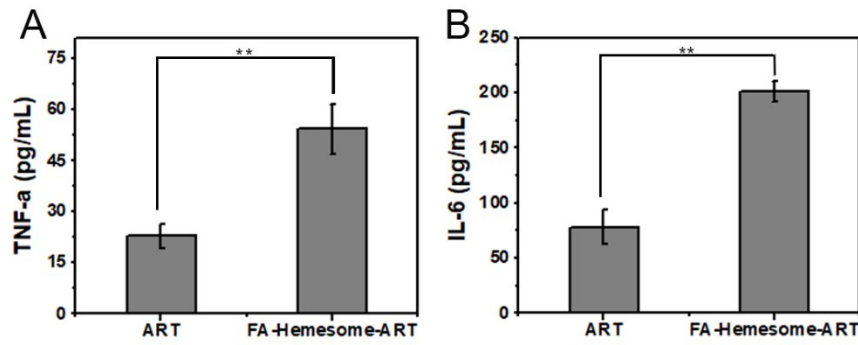

**Figure. S13** The intratumoral secretion of (A) TNF- $\alpha$  and (B) IL-6 in the MC38 tumor bearing C57Bl/6 mice receiving oral treatments of ART and FA-Hemesome-ART NPs, respectively (n = 3). \*\*P value < 0.01 by student's two-tailed t test.

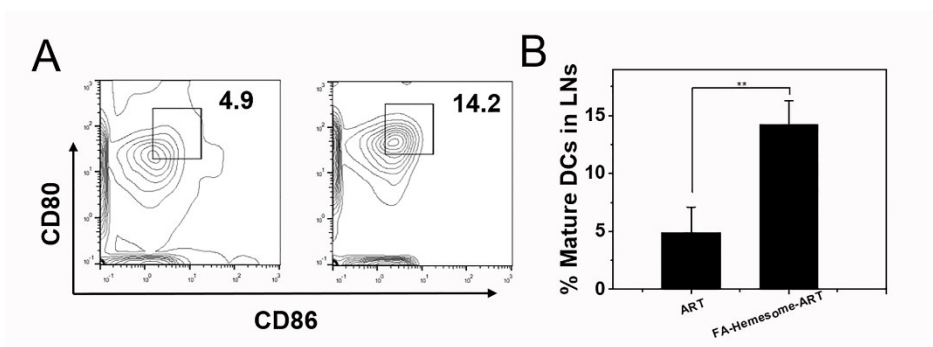

**Figure 14** DCs maturation induced by ICD for assessment by flow cytometry after staining with CD11c<sup>+</sup>, CD80<sup>+</sup>, and CD86<sup>+</sup> on MC38 tumor-bearing mice (gated on CD11<sup>+</sup> DCs) (n = 3). \*\*P value < 0.01 by student's two-tailed t test.
